# Supplementary material for: Analysis of the Antioxidant Activity, Lipid Profile, and Minerals of the Skin and Seed of Hazelnuts (Corylus avellana L.), Pistachios (Pistacia vera) and Almonds (Prunus dulcis)—A Comparative Analysis
Source: MDPI journal article supplement (doi:10.3390/appliedchem3010008), 2023-02-17
Supplement: s1 [file s1]

Archive with 1 entries (1 files):
- appliedchem-2089938-supplementary.pdf
