# Supplementary material for: Analysis of the Antioxidant Activity, Lipid Profile, and Minerals of the Skin and Seed of Hazelnuts (Corylus avellana L.), Pistachios (Pistacia vera) and Almonds (Prunus dulcis)—A Comparative Analysis
Source: MDPI journal article supplement (doi:10.3390/appliedchem3010008), 2023-02-17
Supplement: s1 [file s1 › appliedchem-2089938-supplementary.pdf]

## Supplementary material

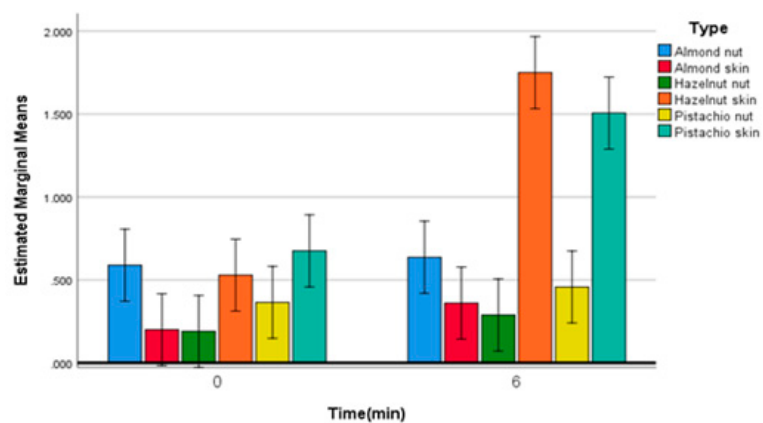

Figure S1. Comparing mean differences of antioxidants values between seeds and skin samples.

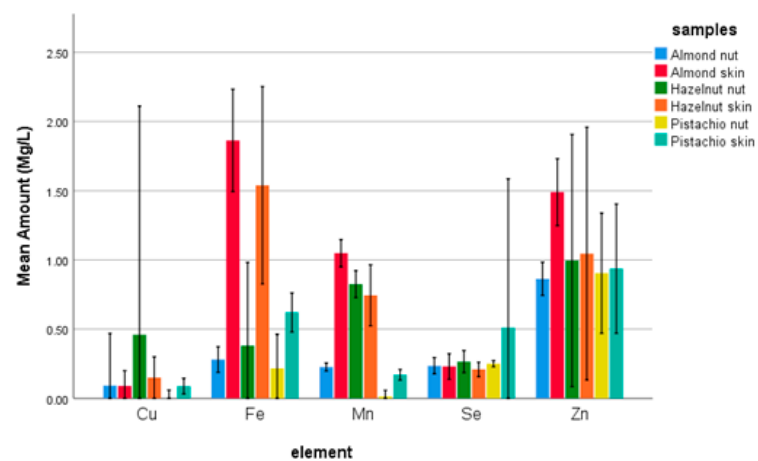

**Figure S2.** Different amounts of minerals in mg/L in almond, hazelnut, and pistachio.

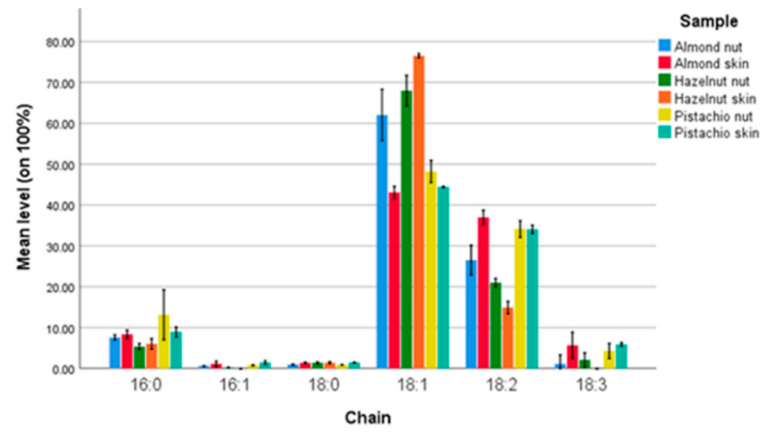

**Figure S3.** Fatty acid content in almond, hazelnut, and pistachio seed and skin.
